# Supplementary material for: Microwave-assisted fabrication of a self-supported graphene-based high-entropy alloy electrode for efficient and stable electrocatalytic nitrate reduction to ammonia
Source: Royal Society of Chemistry journal article supplement (doi:10.1039/d4qi02881c), 2024-11-28
Supplement: d4qi02881c1.pdf [file d4qi02881c1.pdf]

## Supplementary information

### Microwave-assisted fabrication of self-supported graphene-based high-entropy alloy electrode for efficient and stable electrocatalytic nitrate reduction to ammonia

Yun Ling,<sup>\*a,b</sup> Qingyun Feng,<sup>a</sup> Xuan Zheng,<sup>\*a</sup> Hui Su,<sup>a</sup> Yuanyuan Zhang,<sup>a</sup> Zehua Zou,<sup>a</sup> Aifen Liu,<sup>a</sup> Yang Huang,<sup>a</sup> Jing Tang,<sup>c</sup> Yi Li,<sup>c</sup> Maosheng Zhang<sup>a</sup> and Qingxiang Wang<sup>a</sup>

<sup>a</sup>*Fujian Provincial Key Laboratory of Modern Analytical Science and Separation Technology, Fujian Provincial Key Laboratory of Pollution Monitoring and Control, College of Chemistry, Chemical Engineering and Environment, Minnan Normal University, Zhangzhou 363000, China*

<sup>b</sup>*Key Laboratory of Advanced Energy Materials Chemistry (Ministry of Education), Nankai University, Tianjin 300071, China*

<sup>c</sup>*Key laboratory for analytical science of food safety and biology, Ministry of Education, College of Chemistry, Fuzhou University, Fuzhou 350116, China*

E-mail: [lingyun@mnnu.edu.cn](mailto:lingyun@mnnu.edu.cn); [zx1974@mnnu.edu.cn](mailto:zx1974@mnnu.edu.cn)

## Experimental sections

### Chemicals and reagents

Ammonium chloride ( $\text{NH}_4\text{Cl}$ ,  $\geq 99.5\%$ ), sodium salicylate ( $\text{C}_7\text{H}_5\text{NaO}_3$ ,  $\geq 99.5\%$ ), trisodium citrate dihydrate ( $\text{C}_6\text{H}_5\text{Na}_3\text{O}_7 \cdot 2\text{H}_2\text{O}$ ,  $\geq 99.0\%$ ), sodium hydroxide ( $\text{NaOH}$ ,  $\geq 96.0\%$ ), ferric chloride hexahydrate ( $\text{FeCl}_3 \cdot 6\text{H}_2\text{O}$ ,  $\geq 99.0\%$ ), cobalt chloride hexahydrate ( $\text{CoCl}_2 \cdot 6\text{H}_2\text{O}$ ,  $\geq 99.0\%$ ), nickel chloride hexahydrate ( $\text{NiCl}_2 \cdot 6\text{H}_2\text{O}$ ,  $\geq 98.0\%$ ), copper chloride dihydrate ( $\text{CuCl}_2 \cdot 2\text{H}_2\text{O}$ ,  $\geq 99.0\%$ ), stannous chloride dihydrate ( $\text{SnCl}_2 \cdot 2\text{H}_2\text{O}$ ,  $\geq 98.0\%$ ), phosphoric acid ( $\text{H}_3\text{PO}_4$ ,  $\geq 85.0\%$ ), hydrochloric acid ( $\text{HCl}$ ), sulfuric acid ( $\text{H}_2\text{SO}_4$ ), sulfamic acid ( $\text{NH}_2\text{SO}_3\text{H}$ ,  $\geq 99.5\%$ ) and sodium

hypochlorite solution ( $\text{NaClO}$ , available chlorine 8.0%) were purchased from Xilong Scientific Co., Ltd. Ethyl alcohol ( $\text{C}_2\text{H}_5\text{OH}$ ,  $\geq 99.7\%$ ), sodium sulfate ( $\text{Na}_2\text{SO}_4$ ,  $\geq 99.0\%$ ), sodium nitroferricyanide (III.) ( $\text{C}_5\text{FeN}_6\text{Na}_2\text{O} \cdot 2\text{H}_2\text{O}$ , 99.0%), N-(1-Naphthyl)ethylenediamine dihydrochloride ( $\text{C}_{12}\text{H}_{16}\text{Cl}_2\text{N}_2$ ,  $\geq 97.0\%$ ) and aminobenzene sulfonamide ( $\text{C}_6\text{H}_8\text{N}_2\text{O}_2\text{S}$ ,  $\geq 99.8\%$ ) were purchased from Sinopharm Chemical Reagent Co., Ltd. Hydrophilic carbon paper (Taiwan CeTech Co., Ltd). Ar gas (99.999%) was purchased from Zhangzhou Xinxing Gas Co., Ltd.

### **Electrochemical tests**

All electrochemical experiments were conducted in a Nafion 115 membrane-separated H-type electrolytic cell. A three-electrode system was employed, with the FeCoNiCuSn HEA catalyst as the working electrode, a platinum mesh as the counter electrode, and an Ag/AgCl electrode (filled with saturated KCl solution) as the reference electrode. The electrolyte used was 100 ppm  $\text{NO}_3^-$ -N + 0.1M  $\text{Na}_2\text{SO}_4$  solution (30 mL). Electrochemical measurements were performed using a DH7000 electrochemical workstation (Donghua Analytical, China). Linear sweep voltammetry (LSV) was conducted at a scan rate of 5 mV/s, within the potential range from 0 V to -1.1 V vs. RHE. Chronoamperometry tests were performed for 1 hour at -0.7, -0.8, -0.9, -1.0, and -1.1 V vs. RHE, respectively. The double-layer capacitance was obtained through cyclic voltammetry (CV) at different sweep rates (40, 60, 80, 100, 120, 140 and 160  $\text{mV s}^{-1}$ ) within the potential range of 0.1-0.3 V vs. RHE. Unless otherwise specified, the electrochemical optimization experiments were conducted at a potential of -1.0 V vs. RHE.

### **Characterization**

Powder X-ray diffraction (XRD) patterns were obtained using a Rigaku-Ultima IV diffractometer with Cu  $\text{K}\alpha$  radiation ( $\lambda = 1.5406 \text{ \AA}$ ). Scanning electron microscopy (SEM) and Energy Dispersive X-ray (EDX) mapping were performed using a GeminiSEM 300 high-resolution scanning electron

microscope. Transmission electron microscopy (TEM) and high-resolution TEM (HRTEM) were conducted with an FEI Tecnai G2 F30 microscope operating at 300 kV. X-ray photoelectron spectroscopy (XPS) spectra were collected using a Thermo Escalab 250Xi spectrometer. Raman spectra were acquired on a Nanophoton Raman-11 instrument with 532 nm laser excitation. Fourier-transform infrared (FT-IR) spectra were measured using a Nicolet iS10 spectrometer. Absorbance spectra were obtained using a Shimadzu UV-2600i UV-vis spectrophotometer. Microwave heating was carried out using an EMA34GTQ-SS microwave oven (Midea, China). The metal contents in the FeCoNiCuSn HEA catalysts were determined using an Agilent 5110-based ICP-OES.

### **Determination of $\text{NO}_3^-$ -N**

First, a specific volume of electrolyte is extracted from the electrolytic cell and diluted to 5 mL to bring it within the detection range. Subsequently, 100  $\mu\text{L}$  of 1 M HCl and 10  $\mu\text{L}$  of 0.8 wt% sulfamic acid solution are added to the diluted sample solution. Following a 15-minute incubation period, the solution's absorbance is measured using a UV-Vis spectrophotometer at wavelengths of 220 nm and 275 nm. The final absorbance of  $\text{NO}_3^-$ -N is calculated using the formula:  $A = A_{220\text{ nm}} - 2A_{275\text{ nm}}$ . This calculation corrects for any interference from other substances at 275 nm. To construct calibration curves, the absorbance of standard solutions of  $\text{NaNO}_3$  at different concentrations is measured.

### **Detection of $\text{NO}_2^-$ -N**

A mixture comprising of p-aminobenzenesulfonamide (4 g), N-(1-naphthyl)ethylenediamine dihydrochloride (0.2 g), ultra-pure water (50 mL) and phosphoric acid (10 mL) served as the color developing agent. Subsequently, a specific volume of electrolyte was extracted from the cell and diluted to 5 mL to ensure compatibility with the detection range. Next, 100  $\mu\text{L}$  of the color developing reagent were added to the 5 mL solution and thoroughly mixed. After allowing the mixture to stand for 30 minutes, the absorption intensity at a wavelength of 540 nm was recorded.

Calibration curves were generated by measuring the absorbance of  $\text{NaNO}_2$  solutions of various concentrations. These curves facilitated the quantification of the desired analyte based on its absorbance.

### **Determination of $\text{NH}_3$**

The concentration of  $\text{NH}_3$  was determined using indophenol blue spectrophotometry, following dilution of the resulting electrolyte. Specifically, 4 mL of the diluted electrolyte were mixed with 500  $\mu\text{L}$  of developer A (containing 5 wt%  $\text{C}_7\text{H}_5\text{O}_3\text{Na}$ , 5 wt%  $\text{C}_6\text{H}_5\text{Na}_3\text{O}_7$ , and  $\text{NaOH}$ ). To this mixture, 50  $\mu\text{L}$  of developer B (0.05 M  $\text{NaClO}$  solution) and 50  $\mu\text{L}$  of developer C (1 wt%  $\text{Na}_2\text{Fe}(\text{CN})_5\text{NO}\cdot 2\text{H}_2\text{O}$  solution) were added. After thorough mixing, the absorbance was measured using UV-Vis spectrophotometry at a wavelength of 670 nm following a 1-hour incubation period. Calibration curves were established by measuring the absorbance of  $\text{NH}_4\text{Cl}$  solutions of varying concentrations.

### **Isotope labeling experiment**

An isotopically labeled nitrate reduction experiment was conducted to confirm the ammonia source, using  $\text{Na}^{15}\text{NO}_3$  (abundance: 99 atom%, chemical purity:  $\geq 98.5\%$ ) as the feed nitrogen (N) source. In this experiment, 0.1M  $\text{Na}_2\text{SO}_4$  served as the electrolyte, and  $\text{Na}^{15}\text{NO}_3$  with a concentration of 100 ppm  $^{15}\text{NO}_3^-$ -N was introduced as the reactant. The resulting  $^{15}\text{NH}_4^+$ - $^{15}\text{N}$  electrolyte obtained through electroreduction was adjusted to pH=2 using 1 M  $\text{H}_2\text{SO}_4$  and characterized by  $^1\text{H}$  NMR with maleic acid as an external standard. To establish a calibration curve, solutions of  $^{14}\text{NH}_4^+$ - $^{14}\text{N}$  standard ( $^{14}\text{NH}_4\text{Cl}$  with concentrations ranging from 20 to 200 ppm) were prepared using 0.1 M  $\text{Na}_2\text{SO}_4$  as the solvent. Subsequently, 50 mL of each concentration of  $^{14}\text{NH}_4^+$ - $^{14}\text{N}$  standard solution was mixed with 1 mL of 20 mg  $\text{mL}^{-1}$  maleic acid. A 0.5 mL aliquot of the resulting mixture was combined with 90  $\mu\text{L}$  of deuterium oxide ( $\text{D}_2\text{O}$ ) for  $^1\text{H}$  NMR detection. The concentration of

$^{14}\text{NH}_4^+$ - $^{14}\text{N}$  was determined by the area ratio, where the peak area ratio of  $^{14}\text{NH}_4^+$ - $^{14}\text{N}$  to maleic acid was utilized for calibration purposes.

### Calculation of yield, selectivity and Faradaic efficiency

The ammonia yield rate and Faradaic efficiency were determined using the following equation:

$$NH_3 \text{ yield} = (c_{NH_3} \times V) / (t \times S) \quad (1)$$

$$FE (\%) = (8 \times c_{NH_3} \times V \times F) / (17 \times Q) \times 100\% \quad (2)$$

The selectivity of ammonia and nitrite using were determined using the following equation:

$$NH_3 \text{ selectivity} (S_{NH_3}) = c_{NH_3} / \Delta C_{NO_3^-} \times 100\% \quad (3)$$

$$NO_2^- \text{ selectivity} (S_{NO_2^-}) = c_{NO_2^-} / \Delta C_{NO_3^-} \times 100\% \quad (4)$$

where,  $c_{NH_3}$  is the measured  $\text{NH}_3$  concentration,  $c_{NO_2^-}$  is the measured  $\text{NO}_2^-$  concentration,  $V$  is the volume of the electrolyte,  $t$  is the NRA test time,  $S$  is the geometric area of the working electrode ( $1 \times 1 \text{ cm}^2$ ),  $\Delta C_{NO_3^-}$  is the concentration difference of  $\text{NO}_3^-$  before and after electrolysis,  $F$  is the Faradaic constant ( $96485 \text{ C mol}^{-1}$ ) and  $Q$  is the total charge used by the electrodes.

### Computational Details

All spin polarization density functional theory calculations were performed by employing the Vienna Ab-initio Simulation Package (VASP).<sup>[1,2]</sup> The Perdew-Burke-Ernzerhof (PBE) functional within the generalized gradient approximation (GGA) was employed to evaluate electron exchange and correlation, while projector augmented wave (PAW) pseudopotential in conjunction with plane-wave basis set of 400 eV cutoff energy were used to describe the wavefunctions of system.<sup>[3, 4]</sup> To better consider the weak interactions between high entropy alloy (HEA) surface and NRA intermediates, DFT-D3 correction method was also applied.<sup>[5]</sup> Due to the computational complexity associated with exploring all configurations of FeCoNiCuSn HEA across the entire structural space, the Alloy Theory Automation Kit (ATAT) software was first employed to produce a FeCoNiCuSn

HEA model consisting of 80 metal atoms (Fe<sub>12</sub>Co<sub>20</sub>Ni<sub>16</sub>Cu<sub>24</sub>Sn<sub>8</sub>) and 15 Å vacuum layer along the Z-axis.<sup>[6,7]</sup> Based on this HEA model, a set of HEA-NRA intermediate complexes were then established and undergone the structural optimization, and the atomic coordinates were collected until reaching the SCF energy and force convergence criteria of  $1.0 \times 10^{-6}$  eV and 0.05 eV /Å, respectively. During the structural optimization, the bottom two atomic layers of these models were fixed, and the Gamma-centered (3×3×1) k-point sampling was applied in the Brillouin zone for all calculations. The Gibbs free energy change of each NRA step was calculated by using the following equation:

$$\Delta G = \Delta E + \Delta E_{ZPE} - n e U + \Delta S_{298.15} \quad (5)$$

Where  $\Delta E$  and  $\Delta E_{ZPE}$  represent the total electron energy difference and zero-point energy correction for each NRA step, respectively, while  $T\Delta S$  denotes the entropy correction at room temperature (298.15 K).  $n$  is the number of transferred electrons,  $U$  is the applied potential and is set as zero. To evade the inaccuracy of density functional theory (DFT) in calculating the energy of charged NO<sub>3</sub><sup>-</sup> ions, gas-phase nitric acid molecule was adopted as a reference and a compensation correction value of 0.75 eV was applied to compute the  $\Delta G_{N(g)}$  by using equation 6.<sup>[8]</sup> As for the calculations of H<sub>2</sub>, H<sub>2</sub>O, and NH<sub>3</sub>, a 15×15×15 Å<sup>3</sup> unit cell and only Gamma k-point were employed. Their ZPE correction were determined through vibration analysis, while the entropy values of these molecules (TS 0.40, 0.21, and 0.60 eV, respectively) were extracted from the standard thermodynamic table.

$$\Delta G_{N(g)} = \Delta E_{(N(g))} + \frac{1}{2} E_{(H_2)} - E_{(*)} - E_{(HN(g))} + 0.75 \text{ eV} \quad (6)$$

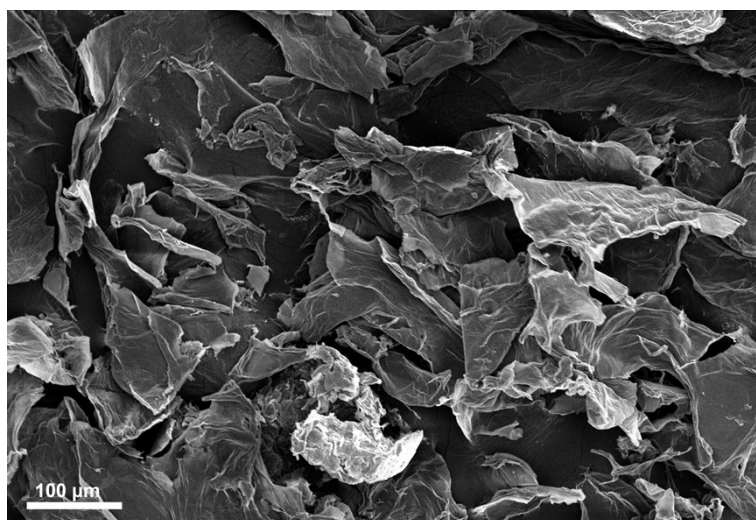

Fig. S1 The SEM image of GO.

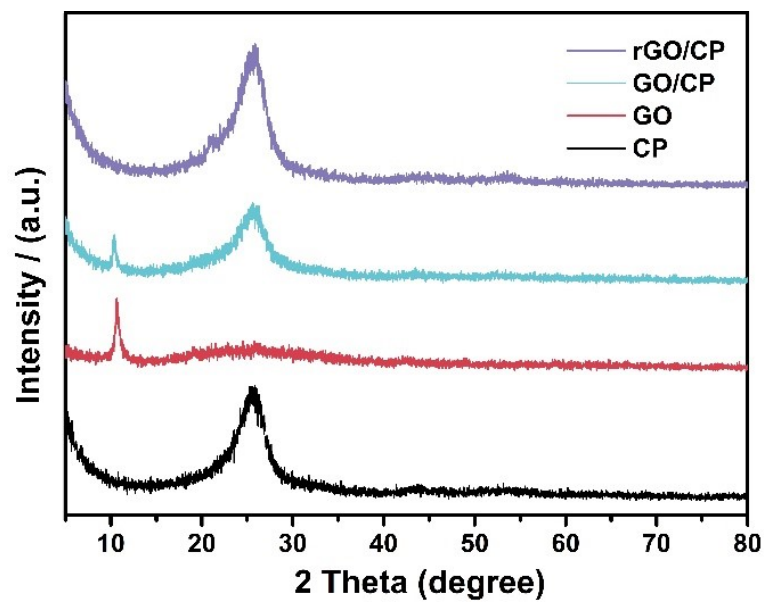

Fig. S2 XRD patterns of carbon paper (CP), GO, GO/CP and rGO/CP.



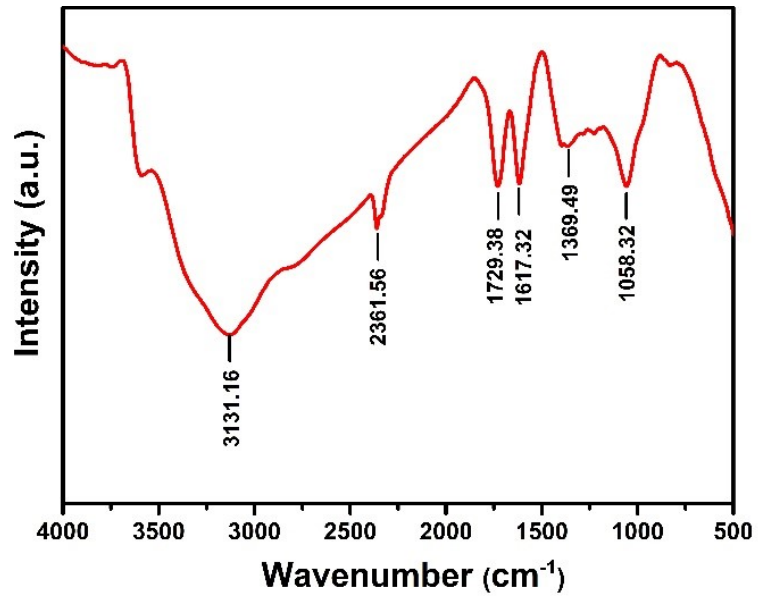

Fig. S3 FTIR spectra of GO.

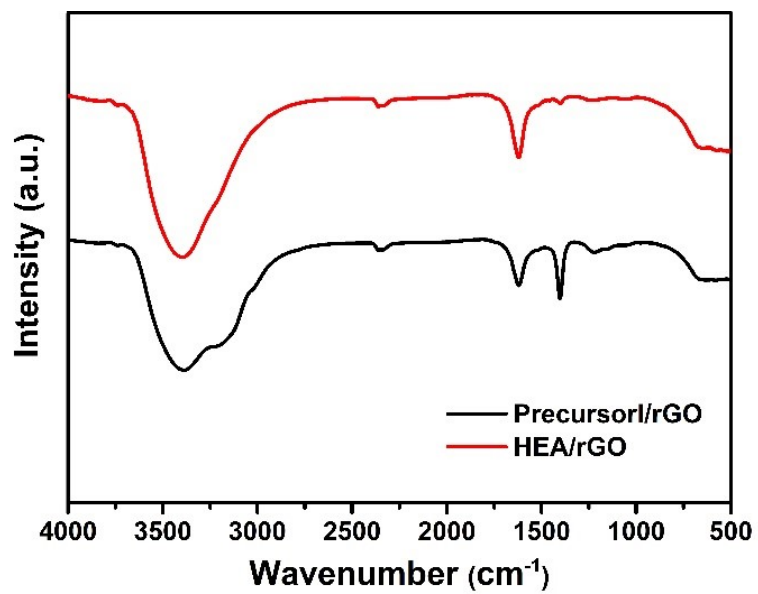

Fig. S4 FTIR spectra of precursor/rGO and HEA/rGO.

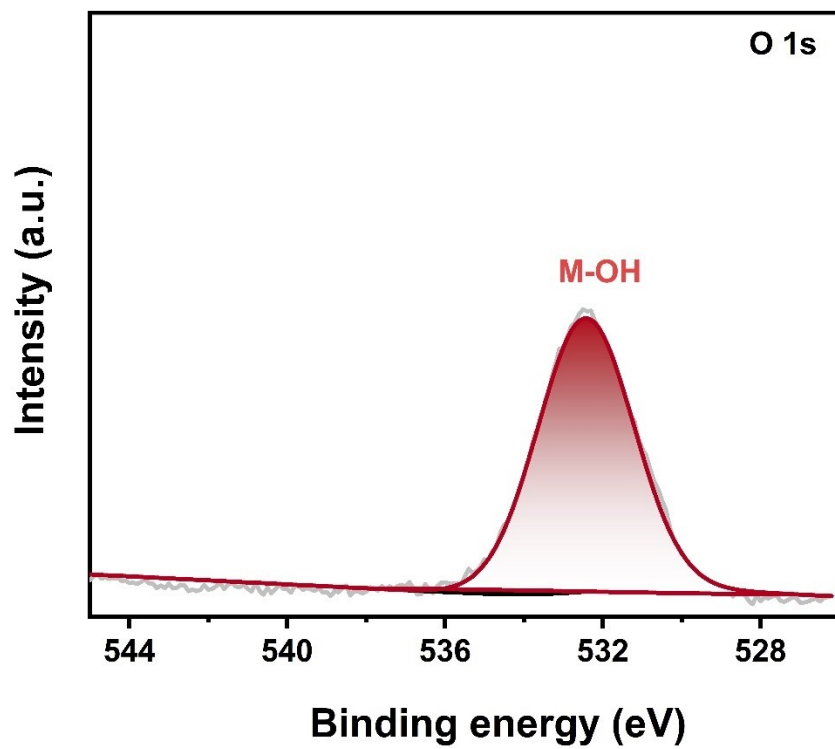

Fig. S5 O 1s of FeCoNiCuSn HEA.

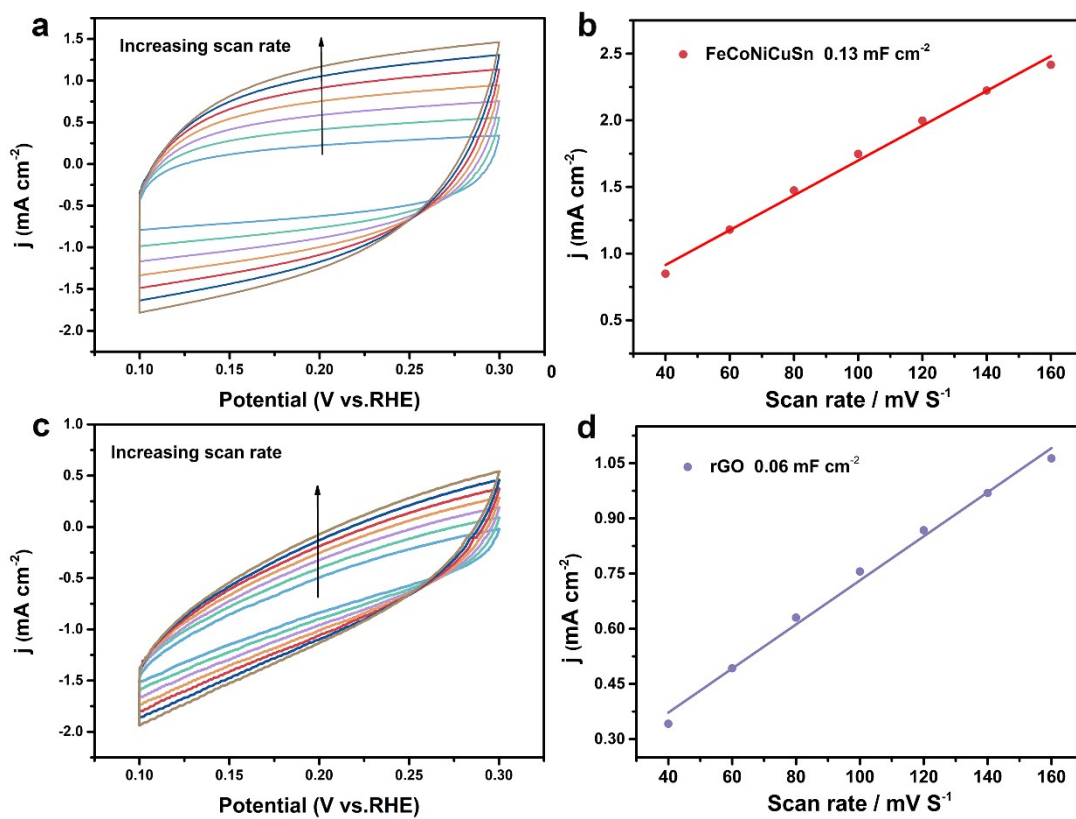

Fig. S6 Cyclic voltammetry measurements with various sweep rates (40, 60, 80, 100, 120, 140 and 160  $\text{mV s}^{-1}$ ) for HEA/rGO/CP (a) and rGO/CP (c). The corresponding double-layer charging current vs the scan rate, and the slope of the linear fit is double-layer capacitance (b, d).

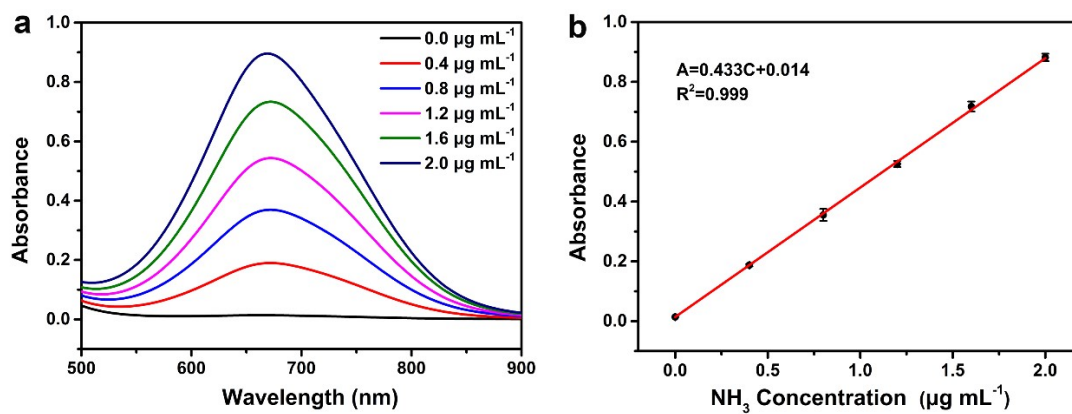

Fig. S7 (a) UV-Vis absorption spectra and (b) corresponding calibration curve used for calculation of  $\text{NH}_3$  concentration.

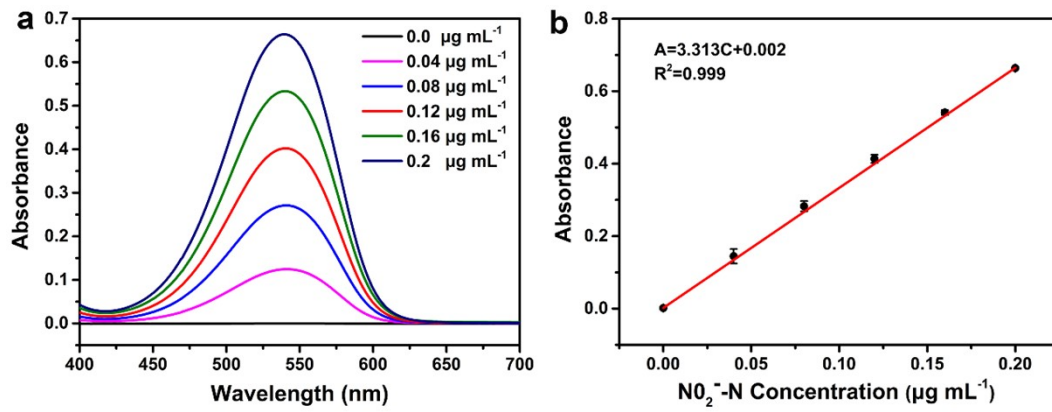

Fig. S8 (a) UV-vis absorption spectra and (b) corresponding calibration curve used for calculation of  $\text{NO}_2^-$ -N concentration.

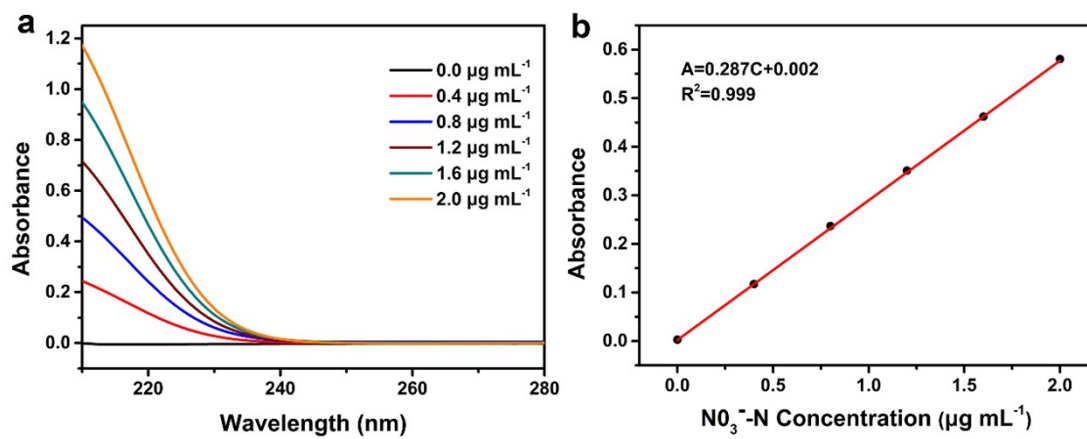

Fig. S9 (a) UV-vis absorption spectra and (b) corresponding calibration curve used for calculation of  $\text{NO}_3^-$ -N concentration.

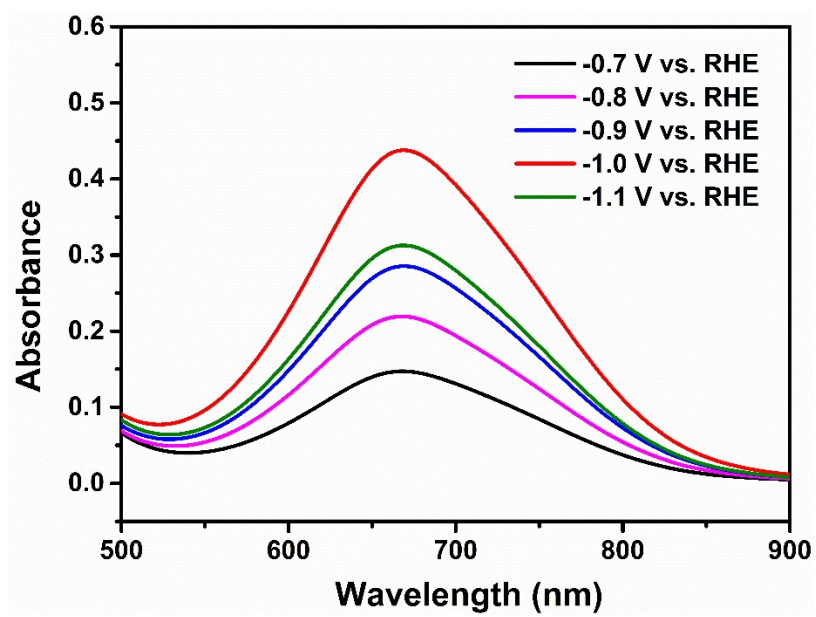

Fig. S10 UV-vis absorption spectra at different potentials.



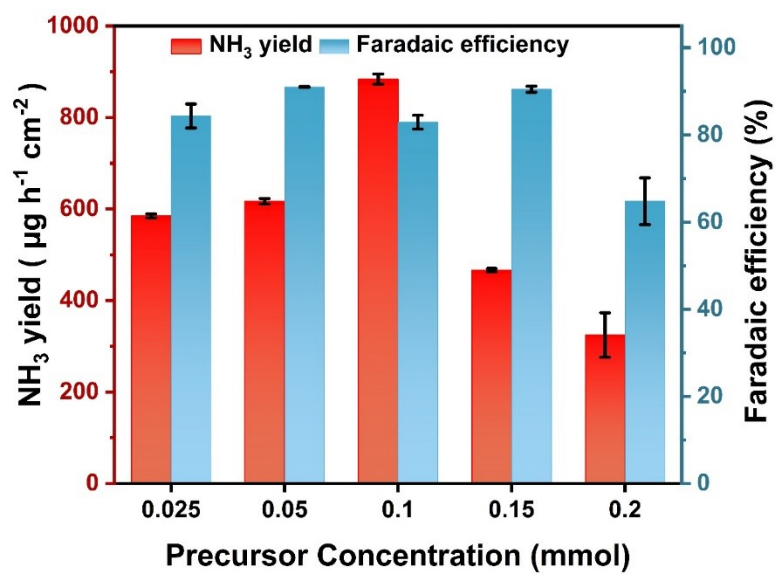

Fig. S11 NH<sub>3</sub> yields and FE with different precursor concentration.

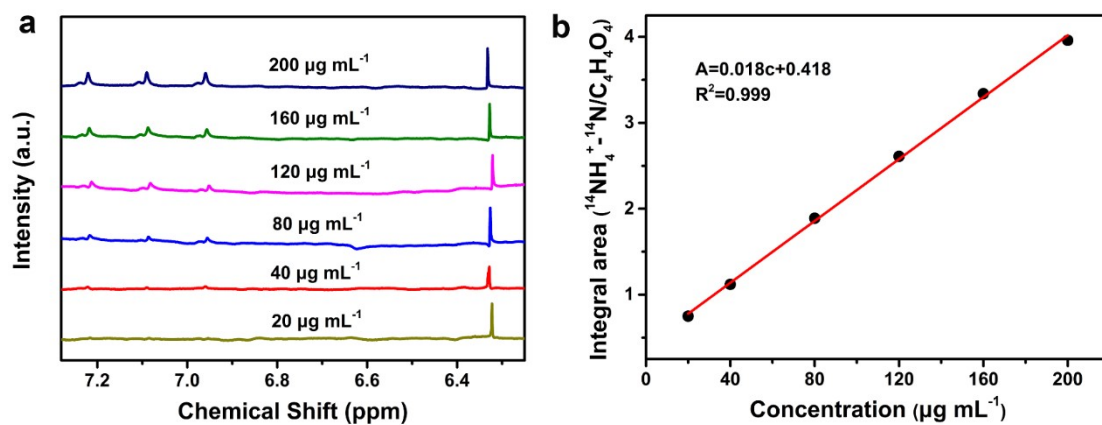

Fig. S12 (a) The  $^1\text{H}$  NMR (400 MHz) spectra of  $^{14}\text{NH}_4^+$  at different standard concentrations with the internal standard of  $\text{C}_4\text{H}_4\text{O}_4$  and (b) corresponding calibration curve.

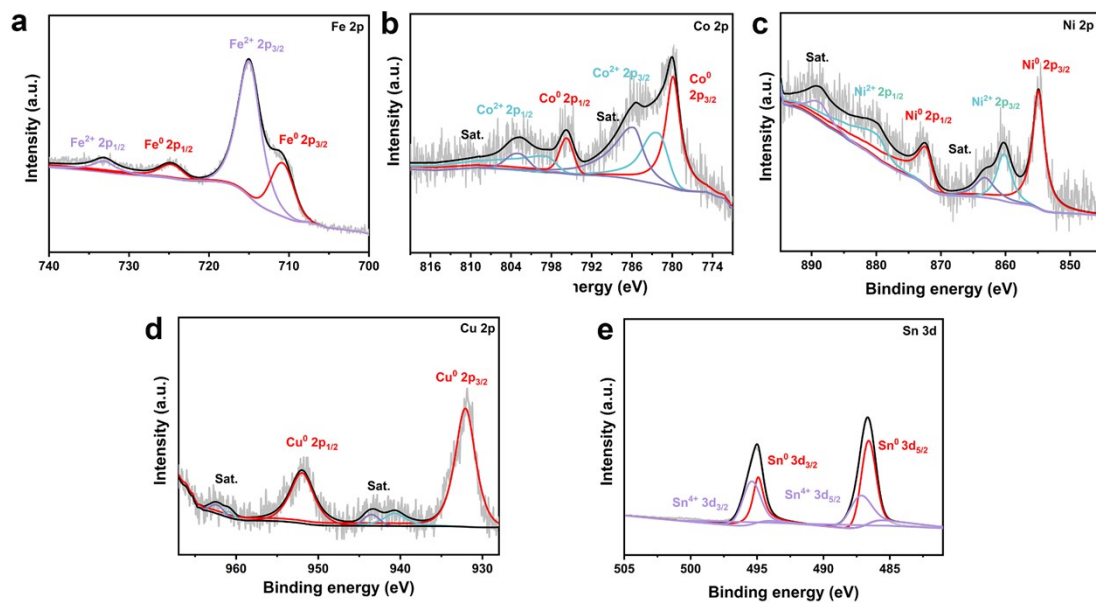

Fig. S13 XPS spectra of FeCoNiCuSn HEA after long-term electrolysis in (a) Fe 2p region, (b) Co 2p region, (c) Ni 2p region, (d) Cu 2p region and (e) Sn 3d region.

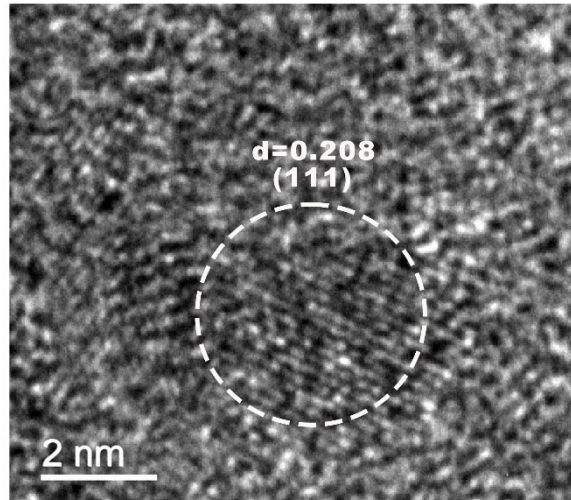

Fig. S14 TEM image of FeCoNiCuSn HEA after long-term electrolysis.

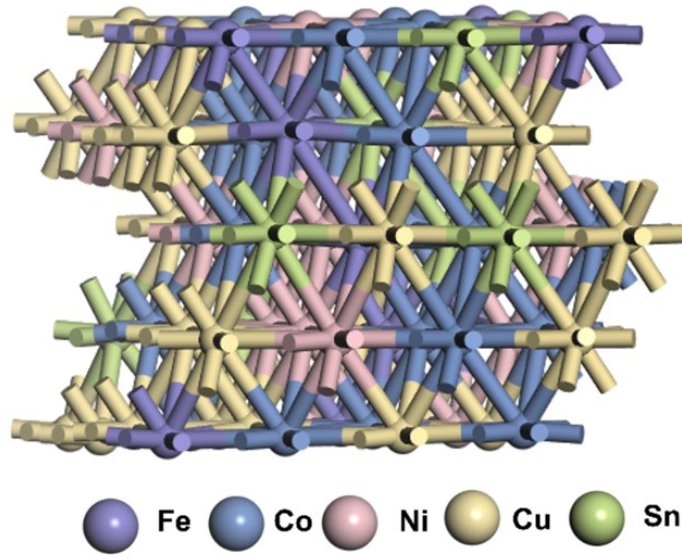

Fig. S15 The structure of FeCoNiCuSn HEA.

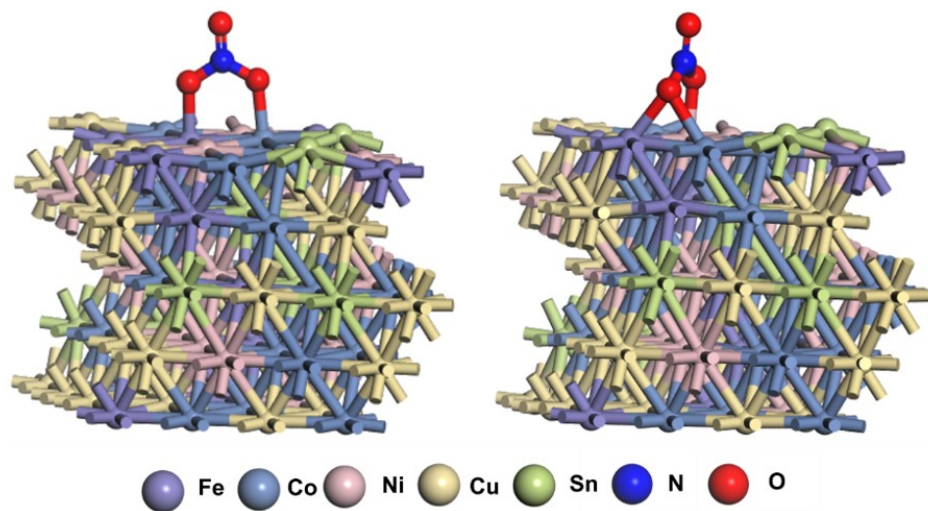

Fig. S16 Structural diagram of some sites of HEA adsorbing  $\text{NO}_3^-$ .

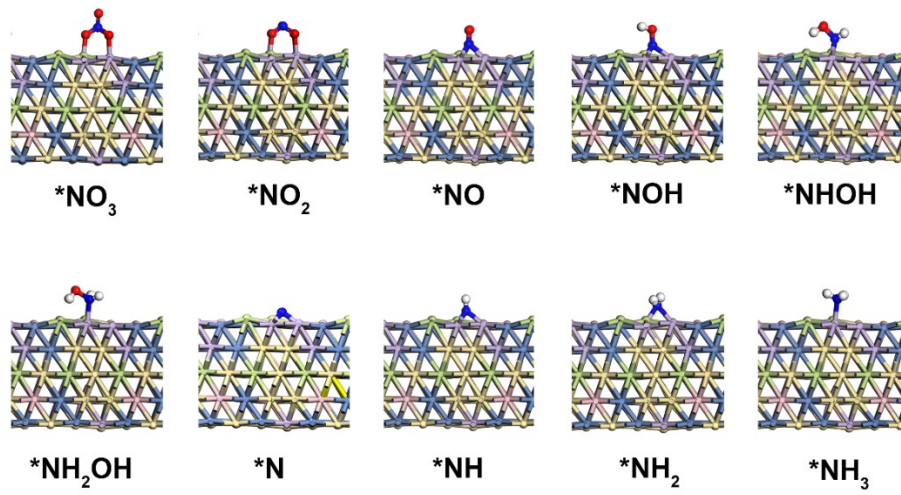

Fig. S17 Side view of various NRA intermediate structures on FeCoNiCuSn HEA surface.

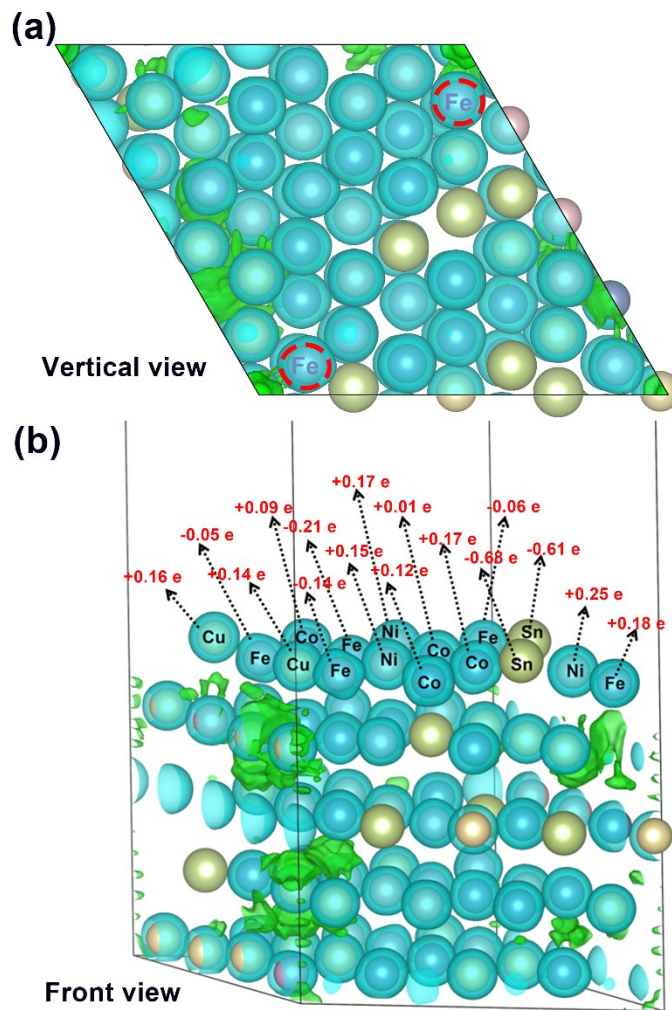

Fig. S18 Difference charge density of metal atoms before and after HEA formation (Fe-Fe site is highlighted in vertical view and the Bader charges of surface atoms are labeled with arrows).



**Table S1.** Elemental composition of FeCoNiCuSn samples measured by ICP-OES

| Element | Element concentration in the original solution of digestion solution $C_1$ (mg/L) | Average element content $C_x$ (mg/kg) | Average element content $C$ (mg/kg) | Wt (%) | Atomic (%) |
|---------|-----------------------------------------------------------------------------------|---------------------------------------|-------------------------------------|--------|------------|
| Fe      | 3.025                                                                             | 6753.212                              | 6785.399                            | 0.68   | 13.01      |
|         | 3.032                                                                             | 6768.022                              |                                     |        |            |
|         | 3.062                                                                             | 6834.963                              |                                     |        |            |
| Co      | 4.953                                                                             | 11056.257                             | 11117.627                           | 1.11%  | 20.13      |
|         | 4.974                                                                             | 11101.783                             |                                     |        |            |
|         | 5.015                                                                             | 11194.841                             |                                     |        |            |
| Ni      | 4.941                                                                             | 11028.506                             | 11071.660                           | 1.11%  | 20.21      |
|         | 4.954                                                                             | 11058.741                             |                                     |        |            |
|         | 4.985                                                                             | 11127.734                             |                                     |        |            |
| Cu      | 6.034                                                                             | 13469.797                             | 13580.982                           | 1.36%  | 22.88      |
|         | 6.093                                                                             | 13599.455                             |                                     |        |            |
|         | 6.126                                                                             | 13673.695                             |                                     |        |            |
| Sn      | 11.793                                                                            | 26322.994                             | 26415.820                           | 2.64%  | 23.77      |
|         | 11.824                                                                            | 26392.617                             |                                     |        |            |
|         | 11.886                                                                            | 26531.850                             |                                     |        |            |

**Table S2.** Physicochemical properties of elemental precursor salts and corresponding metals.

| Precursors        | Chemical reduction potential [V] | Metal | Atomic radius [Å] |
|-------------------|----------------------------------|-------|-------------------|
| FeCl <sub>3</sub> | 0.77, -0.44                      | Fe    | 1.26              |
| CoCl <sub>2</sub> | -0.277                           | Co    | 1.25              |
| NiCl <sub>2</sub> | -0.25                            | Ni    | 1.24              |
| CuCl <sub>2</sub> | 0.34                             | Cu    | 1.28              |
| SnCl <sub>2</sub> | -0.1375                          | Sn    | 1.51              |

Note: source of data: Dean, John A., Lange's Handbook of Chemistry (China Science Publishing & Media Ltd.) (2003).

**Table S3.** Summary of the representative reports on electrocatalytic nitrate reduction to ammonia at ambient conditions.

| Catalyst                | System                                      | Performance                                                                   | Ref.        |
|-------------------------|---------------------------------------------|-------------------------------------------------------------------------------|-------------|
| TiO <sub>2-x</sub>      | 0.5 M Na <sub>2</sub> SO <sub>4</sub> ,     | Y(NH <sub>3</sub> ): 630 μg h <sup>-1</sup> mg <sup>-1</sup>                  | [9]         |
|                         | 50 ppm NO <sub>3</sub> <sup>-</sup> -N      | FE(NH <sub>3</sub> ): 85.0%                                                   |             |
| PTCDA/ Cu               | 0.1 M PBS,                                  | Y(NH <sub>3</sub> ): 436 μg h <sup>-1</sup> cm <sup>-2</sup>                  | [10]        |
|                         | 500 ppm NO <sub>3</sub> <sup>-</sup> -N     | FE(NH <sub>3</sub> ): 77%                                                     |             |
| CuCl_BEF                | 0.5 M Na <sub>2</sub> SO <sub>4</sub> ,     | Y(NH <sub>3</sub> ): 1820 μg h <sup>-1</sup> cm <sup>-2</sup>                 | [11]        |
|                         | 50 ppm NO <sub>3</sub> <sup>-</sup> -N      | FE(NH <sub>3</sub> ): 44.7%                                                   |             |
| Cu@C                    | 1 M KOH,                                    | Y(NH <sub>3</sub> ): 469.5 μg h <sup>-1</sup> cm <sup>-2</sup>                | [12]        |
|                         | 1 mM NO <sub>3</sub> <sup>-</sup>           | FE(NH <sub>3</sub> ): 72%                                                     |             |
| Cu(111) nanodisks       | 0.1 M KOH,                                  | Y(NH <sub>3</sub> ): 2.1 mg h <sup>-1</sup> mg <sub>cat</sub> <sup>-1</sup>   | [13]        |
|                         | 10 mM KNO <sub>3</sub>                      | FE(NH <sub>3</sub> ): 72%                                                     |             |
| Au/Cu SAAs              | 0.5 M Na <sub>2</sub> SO <sub>4</sub> ,     | Y(NH <sub>3</sub> ): 3.2 mg h <sup>-1</sup> cm <sup>-2</sup>                  | [14]        |
|                         | 100 ppm NO <sub>3</sub> <sup>-</sup> -N     | FE(NH <sub>3</sub> ): 99.69%                                                  |             |
| Pd-NDs/Zr-MOF           | 0.1 M Na <sub>2</sub> SO <sub>4</sub> ,     | Y(NH <sub>3</sub> ): 287.31 μg h <sup>-1</sup> cm <sup>-2</sup>               | [15]        |
|                         | 500 ppm NO <sub>3</sub> <sup>-</sup> -N     | FE(NH <sub>3</sub> ): 58.1%                                                   |             |
| Cu <sub>3</sub> P NA/CF | 0.1 M PBS                                   | Y(NH <sub>3</sub> ): 848 μg h <sup>-1</sup> cm <sup>-2</sup>                  | [16]        |
|                         | 0.1 M NaNO <sub>3</sub>                     | FE(NH <sub>3</sub> ): 62.9%                                                   |             |
| Au/C                    | 0.5 M K <sub>2</sub> SO <sub>4</sub>        | Y(NH <sub>3</sub> ): 407.3 μg h <sup>-1</sup> mg <sub>cat</sub> <sup>-1</sup> | [17]        |
|                         | 1 mM KNO <sub>3</sub>                       | FE(NH <sub>3</sub> ): 26%                                                     |             |
| RuNi-MOF                | 0.1 M Na <sub>2</sub> SO <sub>4</sub>       | Y(NH <sub>3</sub> ): 274 μg h <sup>-1</sup> mg <sub>cat</sub> <sup>-1</sup>   | [18]        |
|                         | 50 ppm NaNO <sub>3</sub>                    | FE(NH <sub>3</sub> ): 73%                                                     |             |
| Co-SACs                 | 0.02 M Na <sub>2</sub> SO <sub>4</sub>      | Y(NH <sub>3</sub> ): 408 μg h <sup>-1</sup> cm <sup>-2</sup>                  | [19]        |
|                         | 50 ppm NaNO <sub>3</sub>                    | FE(NH <sub>3</sub> ): 92%                                                     |             |
| Cu/Fe-TiO <sub>2</sub>  | 0.5 M Na <sub>2</sub> SO <sub>4</sub>       | Y(NH <sub>3</sub> ): 505.7 μg h <sup>-1</sup> cm <sup>-2</sup>                | [20]        |
|                         | 50 ppm NaNO <sub>3</sub>                    | FE(NH <sub>3</sub> ): 91.2%                                                   |             |
| <b>FeCoNiCuSn HEA</b>   | <b>0.1 M Na<sub>2</sub>SO<sub>4</sub>,</b>  | <b>Y(NH<sub>3</sub>): 883.7 μg h<sup>-1</sup> cm<sup>-2</sup></b>             | <b>This</b> |
|                         | <b>100 ppm NO<sub>3</sub><sup>-</sup>-N</b> | <b>FE(NH<sub>3</sub>): 94.5%</b>                                              | <b>work</b> |

**Table S4.** Mass and percent of Fe, Co, Ni, Cu, Sn dissolved in electrolyte after electrolysis for one hour at  $-1.0$  V vs. RHE

| Element     | Fe <sub>site</sub> | Co <sub>site</sub> | Ni <sub>site</sub> | Cu <sub>site</sub> | Sn <sub>site</sub> |
|-------------|--------------------|--------------------|--------------------|--------------------|--------------------|
| Mass (mg)   | 0.00269            | 0.000215           | 0.000508           | 0.000331           | 0.000355           |
| Cu1-Fe1     | -447.24            | Fe3_Co3            | -447.75            | Fe4_Fe2            | -447.98            |
| Percent (%) | 0.00898%           | 0.00072%           | 0.00169%           | 0.00110%           | 0.00118%           |
| Fe1_Cu2     | -447.32            | Co3_Sn2            | -447.29            | Sn2_Cu2            | -446.92            |
| Cu2_Fe2     | -447.46            | Cu2_Ni1            | -447.82            | Sn2_Fe1            | -447.32            |
| Co1_Fe3     | -447.24            | Ni1_Co4            | -447.66            | Ni3_Fe1            | -447.41            |
| Fe3_Ni1     | -447.70            | Co4_Fe3            | -447.02            | Ni3_Cu2            | -447.04            |
| Ni1_Co2_Fe2 | -447.68            | Fe2_Co2            | -447.78            | Fe5_Fe2_Cu2        | -447.57            |
| Ni2_Co3     | -447.45            | Co2_Sn1            | -447.21            | Fe5_Fe2            | -447.92            |
| Co3_Co4_Ni1 | -447.67            | Sn1_Fe5            | -447.37            | Fe4_Fe5            | -447.92            |
| Co4_Sn1     | -447.20            | Co1_Fe1            | -447.70            | Ni2_Fe5_Fe4        | -447.57            |

|         |         |         |         |             |          |
|---------|---------|---------|---------|-------------|----------|
| Fe4_Sn2 | -447.43 | Ni2_Fe3 | -447.44 | Fe4_Fe5_Ni2 | -447.57  |
| Sn2_Ni3 | -447.57 | Ni2_Fe4 | -447.56 | Co1_Sn1     | -447.331 |
| Ni3_Fe5 | -447.5  | Fe3_Cu2 | -447.32 | Co1_Co2     | -447.50  |
| Cu1_Co1 | -447.28 | Co3_Ni1 | -447.71 | Cu1_Co2     | -447.34  |
| Co1_Ni2 | -447.41 | Sn2_Co4 | -447.21 | Cu1_Fe2     | -447.48  |
| Fe4_Co3 | -447.79 | Co4_Co2 | -447.51 | Fe4_Co3_Sn2 | -447.18  |
| Fe1_Fe3 | -447.75 | Ni3_Sn2 | -447.01 |             |          |

**Table S5.** The suitable adsorption site and the enthalpy of formation.

**Table S6.** The correction of electronic energies (E), zero-point energies (ZPE) and entropy (TS) of adsorption species on different catalysts' surfaces (in eV). All the slab atoms were fixed during the vibrational analyses. (T = 298.15 K)

|                     | E       | ZPE  | TS   |
|---------------------|---------|------|------|
| *NO <sub>3</sub>    | -472.93 | 0.40 | 0.25 |
| *NO <sub>2</sub>    | -467.51 | 0.26 | 0.19 |
| *NO                 | -462.27 | 0.17 | 0.11 |
| *NOH                | -465.74 | 0.46 | 0.15 |
| *NHOH               | -468.89 | 0.76 | 0.19 |
| *NH <sub>2</sub> OH | -472.44 | 1.11 | 0.22 |
| *N                  | -456.11 | 0.08 | 0.02 |
| *NH                 | -460.32 | 0.37 | 0.04 |

|                  |         |      |      |
|------------------|---------|------|------|
| *NH <sub>2</sub> | -460.69 | 0.67 | 0.09 |
| *NH <sub>3</sub> | -467.21 | 1.00 | 0.17 |

---

## References

- [1] G. Kresse and J. Hafner, Ab initio molecular dynamics for open-shell transition metals, *Phys. Rev. B*, 1993, **48**, 13115-13118.
- [2] G. Kresse and J. Furthmuller, Efficient iterative schemes for ab initio total-energy calculations using a plane-wave basis set, *Phys. Rev. B*, 1996, **54**, 11169-11185.
- [3] P. E. Blochl, Projector augmented-wave method, *Phys. Rev. B*, 1994, **50**, 17953-17979.
- [4] J. P. Perdew, K. Burke and M. Ernzerhof, Generalized gradient approximation made simple, *Phys. Rev. Lett.*, 1996, **77**, 3865-3868.
- [5] S. Grimme, J. Antony, S. Ehrlich and H. Krieg, A consistent and accurate ab initio parametrization of density functional dispersion correction (DFT-D) for the 94 elements H-Pu, *J. Chem. Phys.*, 2010, **132**, 154104.
- [6] A. van de Walle, Multicomponent multisublattice alloys, nonconfigurational entropy and other additions to the Alloy Theoretic Automated Toolkit, *Calphad.*, 2009, **33**, 266–278.
- [7] A. van de Walle, P. Tiwary, M. de Jong, D. L. Olmsted, M. Asta, A. Dick, D. Shin, Y. Wang, L. Q. Chen and Z. K. Liu, Efficient stochastic generation of special quasirandom structures, *Calphad.*, 2013, **42**, 13-18.
- [8] J. X. Liu, D. Richards, N. Singh and B. R. Goldsmith, Activity and selectivity trends in electrocatalytic eitate reduction on transition metals, *ACS Catal.*, 2019, **9**, 7052–7064.
- [9] R. Jia, Y. Wang, C. Wang, Y. Ling, Y. Yu and B. Zhang, Electroreduction to ammonium by constructing oxygen vacancies in TiO<sub>2</sub>, *ACS Catal.*, 2020, **10**, 3533-3540.
- [10] G. F. Chen, Y. Yuan, H. Jiang, S. Y. Ren, L. X. Ding, L. Ma, T. Wu, J. Lu and H. Wang, Electrochemical reduction of nitrate to ammonia via direct eight-electron transfer using a copper–molecular solid catalyst, *Nat. Energy*, 2020, **5**, 605-613.
- [11] W. J. Sun, H. Q. Ji, L. X. Li, H. Y. Zhang, Z. K. Wang, J. H. He and J. M. Lu, Built-in electric field triggered interfacial accumulation effect for efficient nitrate removal at ultra-low concentration and electroreduction to ammonia, *Angew. Chem. Int. Edit.*, 2021, **60**, 22933-22939.
- [12] Z. Song, Y. Liu, Y. Zhong, Q. Guo, J. Zeng and Z. Geng, Efficient electroreduction of nitrate into ammonia at ultralow concentrations via an enrichment effect, *Adv. Mater.*, 2022, **34**,

2204306.

- [13] K. Wu, C. Sun, Z. Wang, Q. Song, X. Bai, X. Yu, Q. Li, X. Wang, H. Zhang, J. Zhang, X. Tong, Y. Liang, A. Khosla and Z. Zhao, Surface reconstruction on uniform Cu nanodisks boosted electrochemical nitrate reduction to ammonia, *ACS Materials Lett.*, 2022, 650-656.
- [14] H. Yin, Y. Peng and J. Li, Electrocatalytic reduction of nitrate to ammonia via a Au/Cu single atom alloy catalyst, *Environ. Sci. Technol.*, 2023, **57**, 3134-44.
- [15] M. Jiang, J. Su, X. Song, P. Zhang, M. Zhu, L. Qin, Z. Tie, J. Zuo and Z. Jin, Interfacial reduction nucleation of noble metal nanodots on redox-active metal-organic frameworks for high-efficiency electrocatalytic conversion of nitrate to ammonia, *Nano Lett.*, 2022, **22**, 2529-37.
- [16] J. Liang, B. Deng, Q. Liu, G. Wen, Q. Liu, T. Li, Y. Luo, A. A. Alshehri, K. A. Alzahrani, D. Ma and X. Sun, High-efficiency electrochemical nitrite reduction to ammonium using a Cu<sub>3</sub>P nanowire array under ambient conditions, *Green Chem.*, 2021, **23**, 5487-5493.
- [17] J. Choi, H. Du, C. K. Nguyen, B. H. R. Suryanto, A. N. Simonov and D. R. MacFarlane, Electroreduction of nitrates, nitrites, and gaseous nitrogen oxides: a potential source of ammonia in dinitrogen reduction studies, *ACS Energy Lett.*, 2020, **5**, 2095-2097.
- [18] J. Qin, K. Wu, L. Chen, X. Wang, Q. Zhao, B. Liu and Z. Ye, Achieving high selectivity for nitrate electrochemical reduction to ammonia over MOF-supported Ru<sub>x</sub>O<sub>y</sub> clusters, *J. Mater. Chem. A*, 2022, **10**, 3963-3969.
- [19] J. Li, M. Li, N. An and X. Liu, Boosted ammonium production by single cobalt atom catalysts with high Faradic efficiencies, *P. Natl. A. Sci.*, 2022, **119**, e2123450119.
- [20] X. Yang, R. Wang, S. Wang, C. Song, S. Lu, L. Fang, F. Yin and H. Liu, Sequential active-site switches in integrated Cu/Fe-TiO<sub>2</sub> for efficient electroreduction from nitrate into ammonia, *Appl. Catal. B: Environ.*, 2023, **325**, 122360.
